# Supplementary material for: A New Xanthone from Moutabea guianensis Aubl
Source: MDPI journal article supplement (doi:10.3390/molecules19078885), 2014-06-26

# Supporting Information

**Figure S1.**  $^1\text{H}$ -NMR (300 MHz,  $\text{CDCl}_3$ ) spectrum of compound **1**.

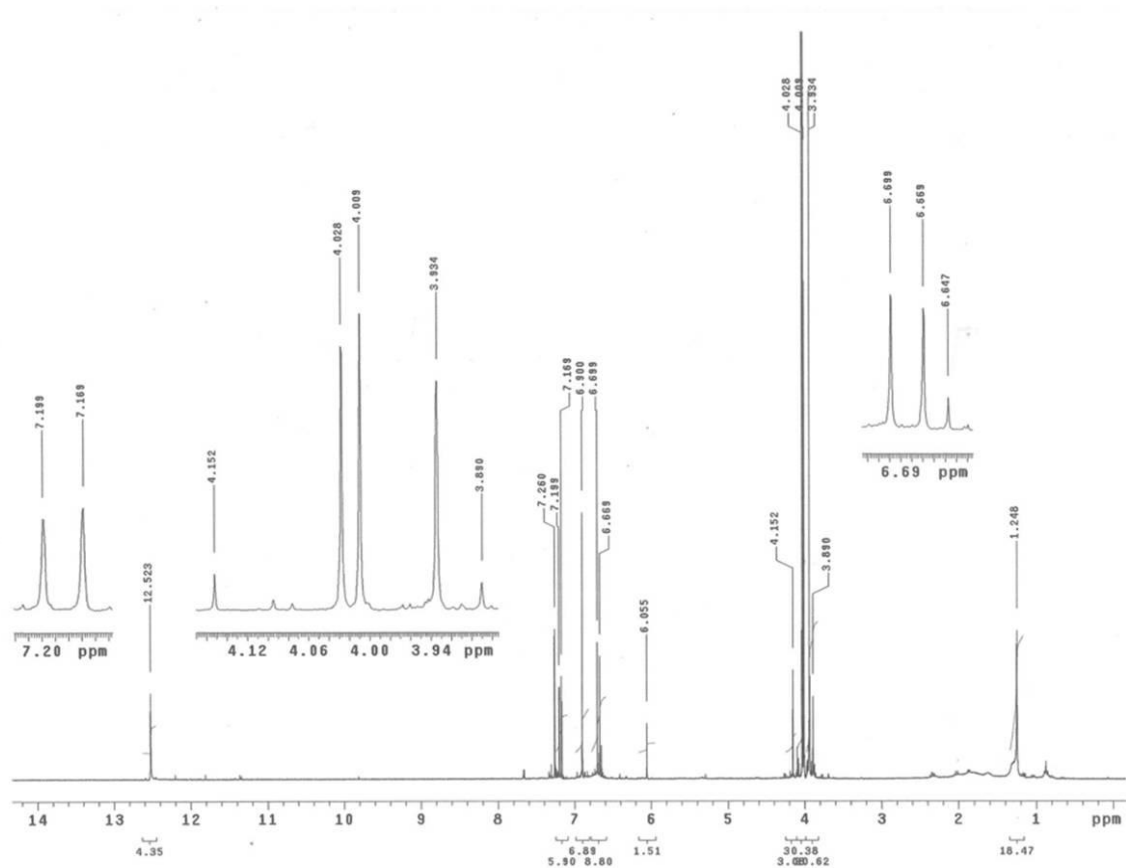

**Figure S2.**  $^{13}\text{C}$ -NMR (75 MHz,  $\text{CDCl}_3$ ) spectrum of compound **1**.

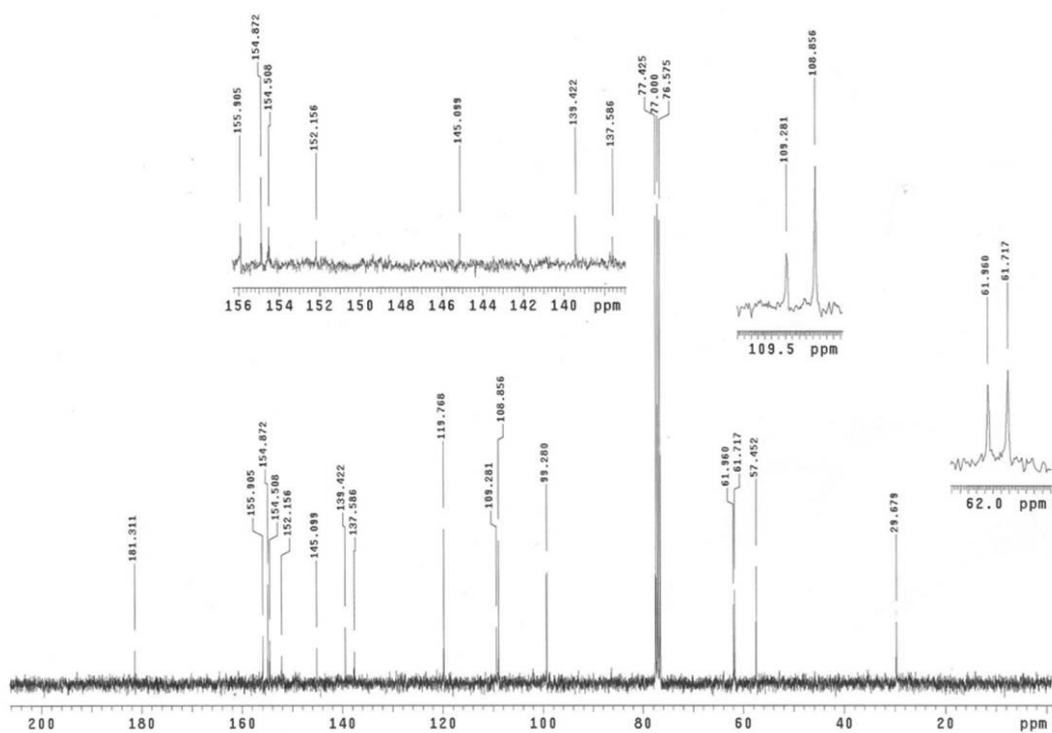

**Figure S3.** DEPT spectrum of compound **1**.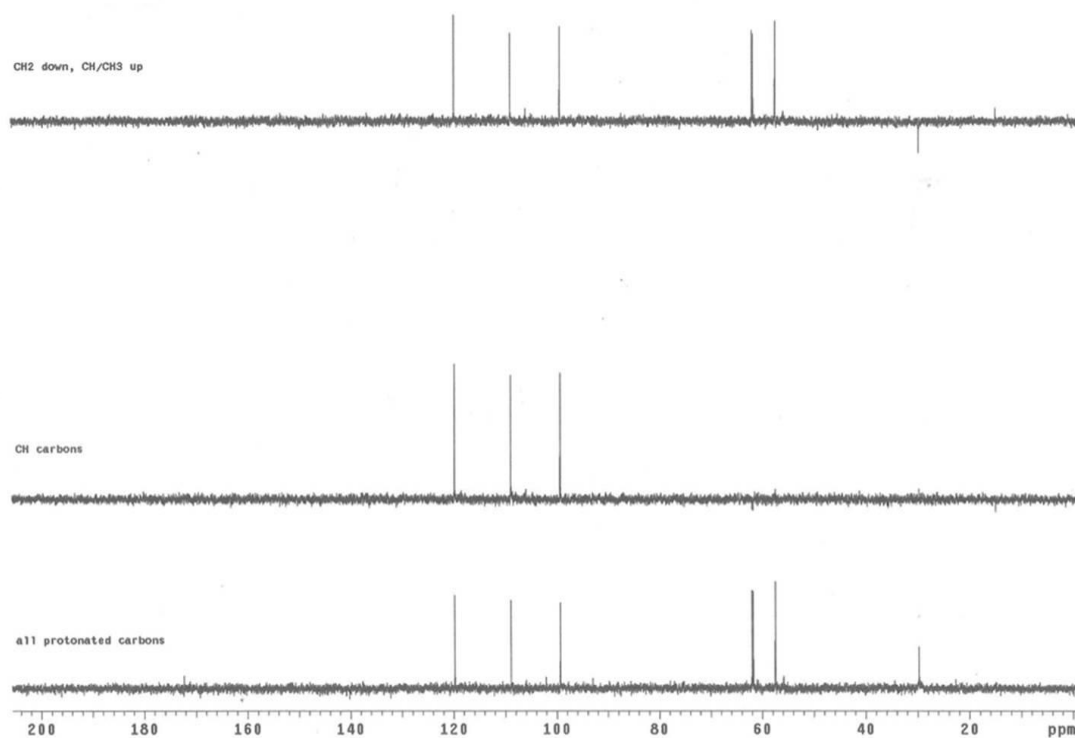**Figure S4.** COSY spectrum of compound **1**.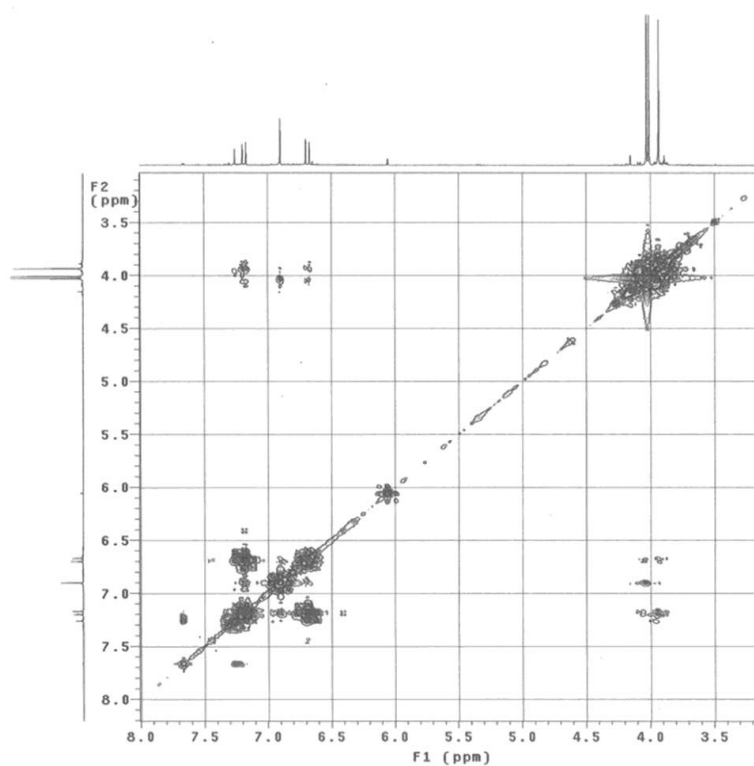

**Figure S5.** HETCOR spectrum of compound **1**.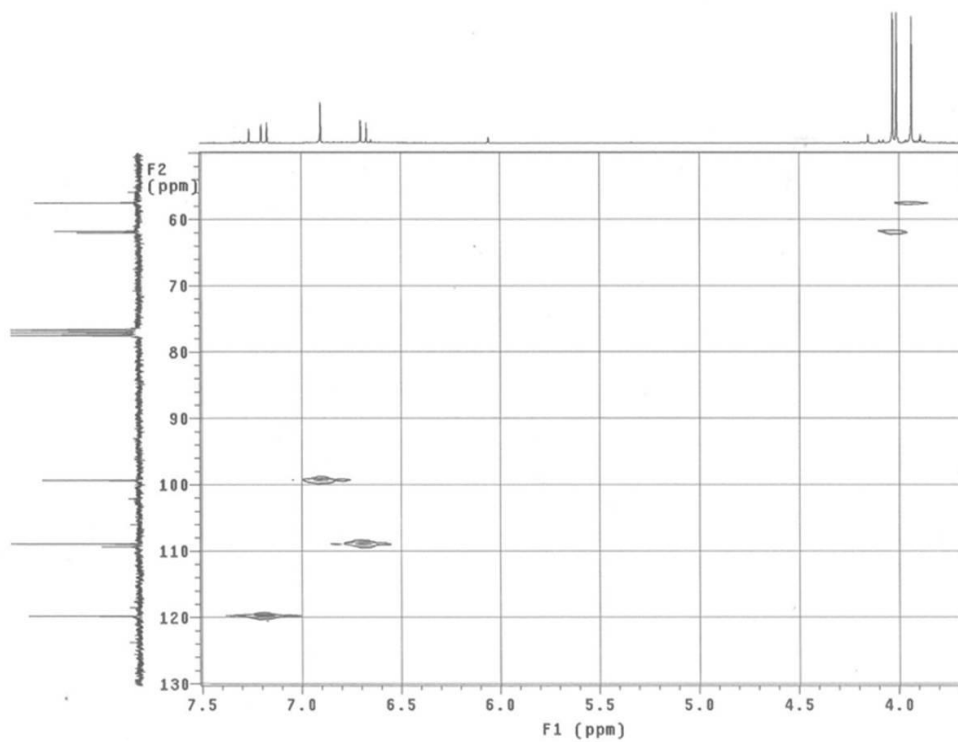**Figure S6.** HMBC spectrum of compound **1**.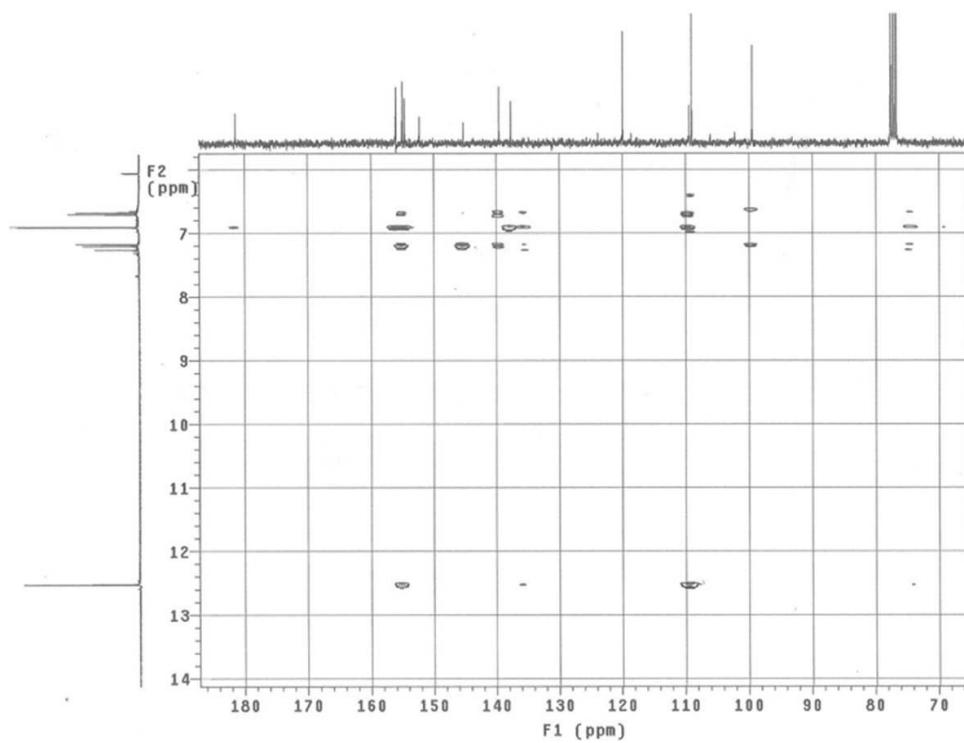

**Figure S7.** Expansion of HMBC spectrum of compound **1**.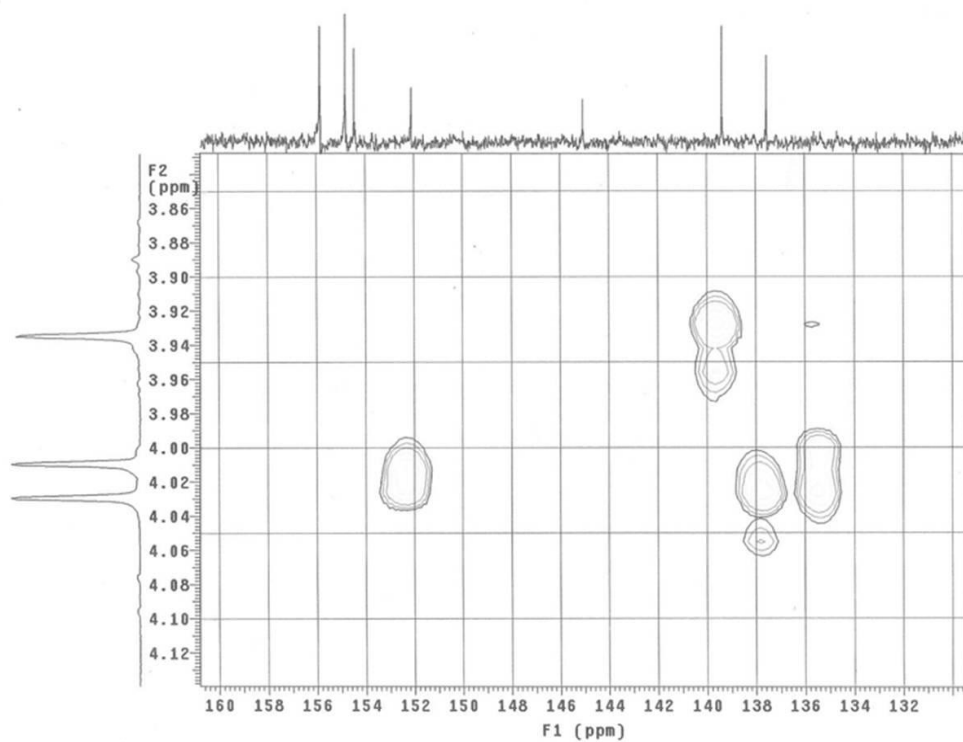**Figure S8.** HRESIMS spectrum of compound **1**.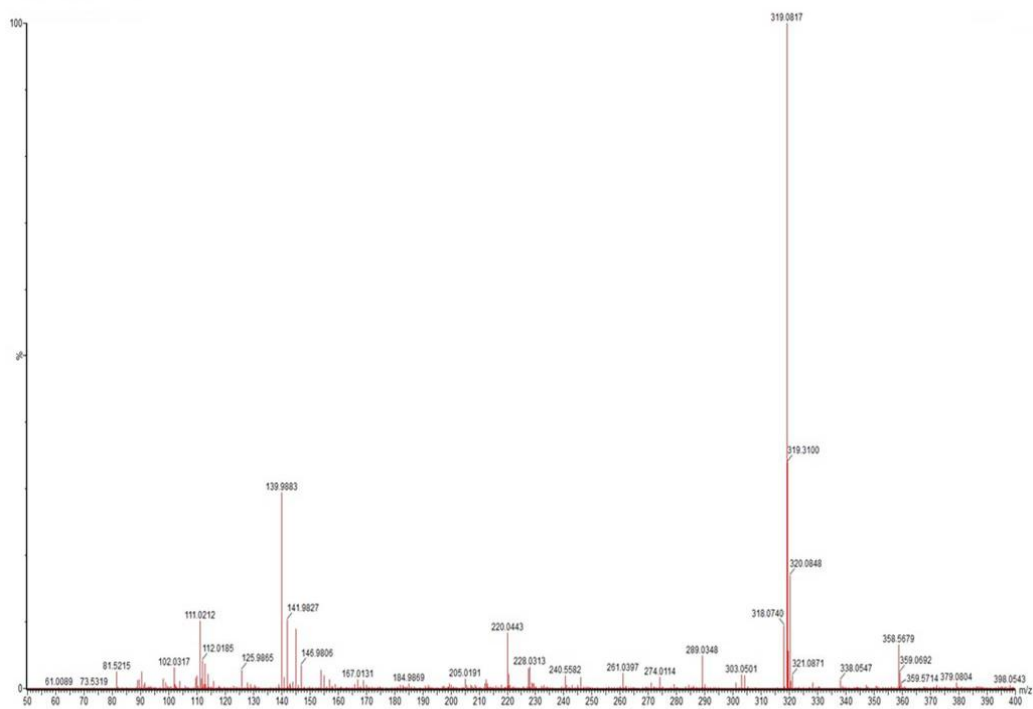

**Figure S9.** UV spectrum of compound **1**.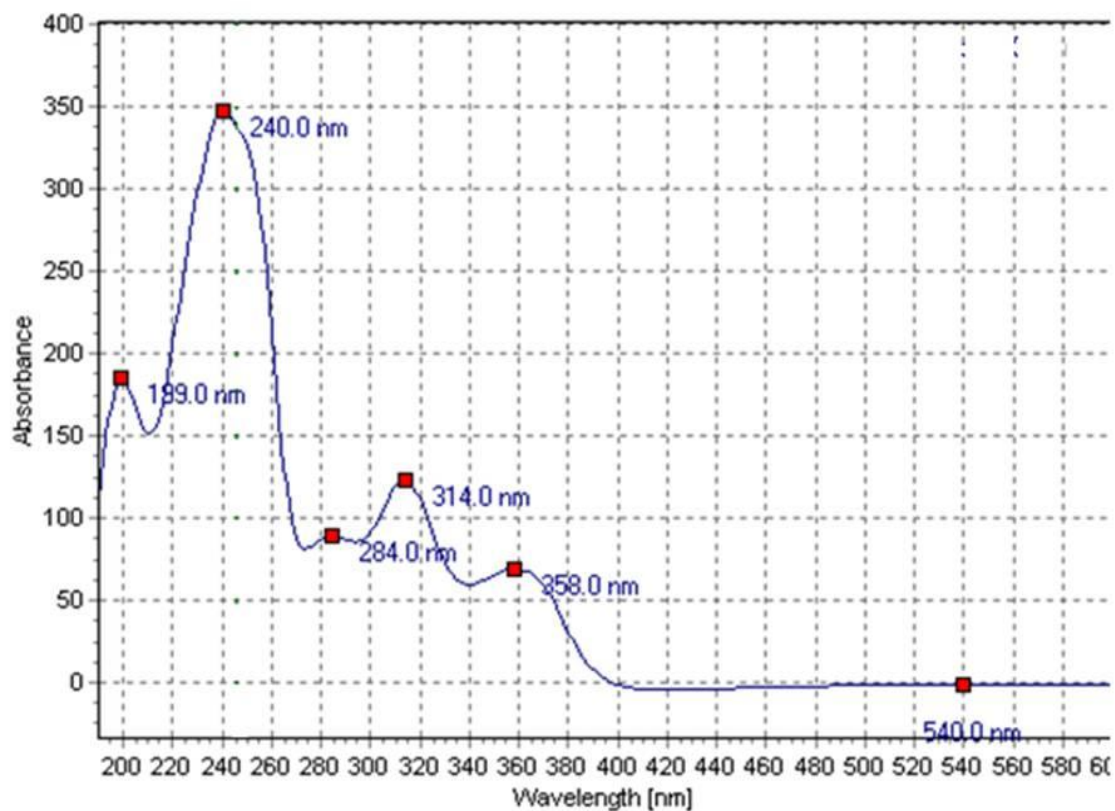**Figure S10.** IR spectrum of compound **1**.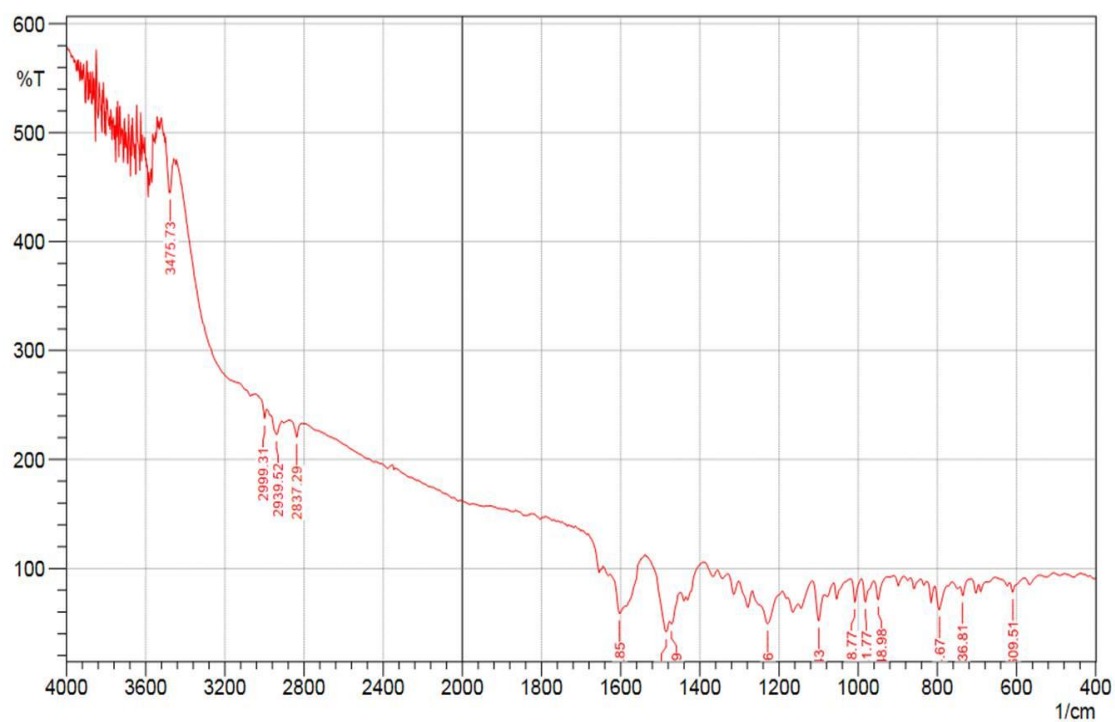

Supplement: s1 [file s1]
